# Supplementary material
Source: Research Square preprint supplement (doi:10.21203/rs.3.rs-9168730/v1)
Supplement: Supplementary file 1 [file 1567c33cbac77e10a65b6407.docx]

# **APPENDIX II: DATA-COLLECTION INSTRUMENTS/QUESTIONNAIRE**

Title: Utilization of modern family planning services among men 15-54 years

| **Respondents ID** | **Sub-county** | **1** | **Parish** | **Village** | **Data collectors code** |
| --- | --- | --- | --- | --- | --- |
| **2** |
|  | **3** |  |  |  |

Please provide your honest opinion whether positive or negative. Answer all questions

**SECTION A: DEMOGRAPHIC CHARACTERISTICS**

| **No** | **Question** | **Coding category (answers)** | | | | | | | | | | | | | | | | | | | | |
| --- | --- | --- | --- | --- | --- | --- | --- | --- | --- | --- | --- | --- | --- | --- | --- | --- | --- | --- | --- | --- | --- | --- |
|  | **Socio-demographic characteristics** | | | | | | | | | | | | | | | | | | | | | |
|  | Age in completed years |  | | | | | | | | | | | | | | | | | | | | |
|  | Marital status | 1. Single | | | 2. Married | | 3. Divorced | | | | | | | 4. Widowed | | | | | | | | |
|  | Education level | 1. None | | | 2. Primary | | 3. Secondary | | | | | | | 4.Tertiary | | | | | | | | |
|  | Religion | 1.Anglican | | | 2.Catholic | | 3.Muslim | | | | | | | 4.Others | | | | | | | | |
|  | Do you have any source of income? | | | | | | 1 = Yes | | | | | | | 2 = No | | | | | | | | |
|  | What is your source of income? | | 1. Farming | | | 2. Fishing | | 3. Business | | | | 4. Salary | | | | | | | 5. Others | | | |
| **SECTION B: TO DETERMINE THE PROPORTION OF MEN 15-54 YEARS USING MODERN FP SERVICES** | | | | | | | | | | | | | | | | | | | | | | |
| **Family planning;** Now I would like us to talk about family planning - the various ways or methods that a man or couple can use to delay or avoid a pregnancy, how you get and use them. | | | | | | | | | | | | | | | | | | | | | | |
|  | Do you know any modern FP method? | | | | | | | | | 1. Yes | | | | | | | | | | 2. No | | |
|  | Which male methods do you know? (PROBE: condom or male sterilization, and how they work). | | | | | | | | | Mention them…………….. | | | | | | | | | | | | |
|  | I would like to ask you about your recent sexual activity. When was the last time you had sexual intercourse? (Days, weeks, months, or years). | | | | | | | | | Never | | | | | | | | | |  | | |
| Days ago | | | | | | | | | |  | | |
| Weeks ago | | | | | | | | | |  | | |
| Months ago | | | | | | | | | |  | | |
| Years ago | | | | | | | | | |  | | |
|  | Did you visit (or wish to) a health facility to seek modern FP services in the last 6 months? | | | | | | | | | | | | | | 1. Yes | | | | | | 2. No | |
|  | If yes, did you get the modern FP method you wanted to delay or prevent pregnant? (Or do you think u can get a modern FP method to delay or prevent pregnant of your choice?) | | | | | | | | | | | | | | 1. Yes | | | | | | 2. No | |
|  | Are you using any modern FP? | | | | | | | | | | | | | | 1. Yes | | | | | | 0. No | |
|  | If yes to Qn6, where did you get modern FP services from (mention type of health facility ownership)? | | | | | | | | | | 1. Public | | | | | | | 2. Private | | | | |
|  | If yes to Qn6, what type of modern FP? | | | 1. Condoms: (mention Type? Y/N) | | | | | 2. Vasectomy  (Proof of medical card? Y/N) | | | | | | | | | | | | | |
|  | If yes to Qn6, did you pay for the FP method?  How much? ………………… Uganda shillings. | | | | | | | | | | | | | | 1. Yes | | | | | | 2. No | |
|  | If condom in Qn8; did you use a condom the last time you had sexual intercourse to prevent or delay pregnancy? | | | | | | | | | | | | | | 1. Yes | | | | | | 2. No | |
|  | Do you use a condom every time you have sexual intercourse in the last 6 months? | | | | | | | | | | | | | | 1. Yes | | | | | | 2. No | |
|  | If condoms in Qn8, does the facility perform vasectomy services too? | | | | | | 1. Yes | | | 2. No | | | | | | | 3. Not sure | | | | | |
|  | If No for Qn6, PROBE; any reasons why?  Not married ……………… 1 Fear side effects …………. 5  Not having sex now…….... 2 Stigma & discrimination … 6  Partner away ……………... 3 Costs involved …………… 7  No preferred type.……….... 4 Spouse using modern FP…… 8 | | | | | | | | | | | | | | | | | | | | | |
|  | How far is the nearest health facility where modern FP services are provided?....................km. (mention in kilometre) | | | | | | | | | Less than 5km | | | | | | | | More than 5km | | | | |
| **Please indicate your level of agreement with the following statements –** Likert Scale:  (1 – Strongly Disagree; 2 – Disagree; 3 – Agree; 4 - Strongly Agree). | | | | | | | | | | | | | | | | | | | | | | |
| **SECTION C: TO DETERMINE THE PROPORTION OF MEN 15-54 YEARS HAVING ACCESS TO MODERN FP SERVICES;** | | | | | | | | | | | | | | | | | | | | | | |
| **Dimensions of Access (5As) / Likert Scale** | | | | | | | | | | | | | **1** | | | **2** | | | | **3** | | **4** |
| **Availability:** respondents’ agreement with range of FP methods—male-specific methods; male condoms and vasectomy, and the range of other services offered ensuring access | | | | | | | | | | | | | | | | | | | | | | |
|  | The availability of family planning methods for men in my community meets my FP needs. | | | | | | | | | | | |  | | |  | | | |  | |  |
|  | The variety of family planning services offered for men in my community meets my modern FP needs. | | | | | | | | | | | |  | | |  | | | |  | |  |
| **Accessibility:** respondents’ agreement withthe relationship between the location of supply and the location of clients, taking account of client transportation resources and travel time, distance and cost. | | | | | | | | | | | | | | | | | | | | | | |
|  | The distance to the health facility offering family planning services is adequate. | | | | | | | | | | | |  | | |  | | | |  | |  |
|  | The means of transport available to reach the health facility offering family planning services are satisfactory. | | | | | | | | | | | |  | | |  | | | |  | |  |
|  | The cost of transportation to the health facility offering family planning services is reasonable. | | | | | | | | | | | |  | | |  | | | |  | |  |
|  | The travel time to the health facility offering family planning services is acceptable. | | | | | | | | | | | |  | | |  | | | |  | |  |
| **Affordability:** relates to respondents’ income, ability to pay for FP services, and existing health insurance. | | | | | | | | | | | | | | | | | | | | | | |
|  | The cost of family planning services for men is satisfactory. | | | | | | | | | | | |  | | |  | | | |  | |  |
|  | The availability of insurance cover for family planning services meets the FP needs. | | | | | | | | | | | |  | | |  | | | |  | |  |
|  | Your income level is adequate to access family planning services. | | | | | | | | | | | |  | | |  | | | |  | |  |
|  | It is easy for you to pay for family planning services, either for yourself or your spouses. | | | | | | | | | | | |  | | |  | | | |  | |  |
|  | There are sufficient credit options available in private health facilities to access family planning services. | | | | | | | | | | | |  | | |  | | | |  | |  |
| **Acceptability:** respondents’ attitudes or perceptions and satisfaction with personal and practice characteristics of existing providers. | | | | | | | | | | | | | | | | | | | | | | |
|  | I have positive attitudes towards family planning service providers. | | | | | | | | | | | |  | | |  | | | |  | |  |
|  | I am satisfied with the healthcare workers specific characteristics. | | | | | | | | | | | |  | | |  | | | |  | |  |
|  | I am satisfied with the information provided about the side effects of male family planning methods. | | | | | | | | | | | |  | | |  | | | |  | |  |
| **Accommodation:** theconnection between the manner in which the services are organized to accept clients (including appointment systems, hours of operation, walk-in services) and the clients' ability to follow these factors and the clients' satisfaction with their appropriateness. | | | | | | | | | | | | | | | | | | | | | | |
|  | The organization of family planning services at the health facility meets my needs. | | | | | | | | | | | |  | | |  | | | |  | |  |
|  | The appointment systems for family planning services are satisfactory. | | | | | | | | | | | |  | | |  | | | |  | |  |
|  | The hours of opening of family planning services clinic are suitable. | | | | | | | | | | | |  | | |  | | | |  | |  |
|  | The days family planning services are provided are convenient. | | | | | | | | | | | |  | | |  | | | |  | |  |
|  | The availability of walk-in facilities, call-in, telephone, or online services for family planning is satisfactory. | | | | | | | | | | | |  | | |  | | | |  | |  |
| **SECTION D: FACTORS ASSOCIATED WITH UTILIZATION OF MODERN FP BY MEN;** | | | | | | | | | | | | | | | | | | | | | | |
| **PART 1: Individual Factors/ Likert Scale** | | | | | | | | | | | | | **1** | | | **2** | | | | **3** | | **4** |
|  | I am knowledgeable about different family planning methods available for men | | | | | | | | | | | |  | | |  | | | |  | |  |
|  | I am considering having more children in the future. | | | | | | | | | | | |  | | |  | | | |  | |  |
|  | I believe family planning is important for men's reproductive health, leading to positive outcomes for themselves, their partners, and their families. | | | | | | | | | | | |  | | |  | | | |  | |  |
|  | I feel comfortable discussing family planning issues with my partner or healthcare provider. | | | | | | | | | | | |  | | |  | | | |  | |  |
|  | I am open to using family planning methods to prevent unintended pregnancies. | | | | | | | | | | | |  | | |  | | | |  | |  |
| **PART 2: Enabling/interpersonal factors** | | | | | | | | | | | | | | | | | | | | | | |
| **Skill/Knowledge of Family Planning Provider:** | | | | | | | | | | | | | | | | | | | | | | |
|  | The family planning provider I visited demonstrated sufficient knowledge about modern family planning methods. | | | | | | | | | | | |  | | |  | | | |  | |  |
|  | I felt comfortable discussing family planning issues with the provider. | | | | | | | | | | | |  | | |  | | | |  | |  |
|  | I feel comfortable discussing family planning issues openly in my community. | | | | | | | | | | | |  | | |  | | | |  | |  |
|  | I have faced discrimination from healthcare providers based on my family planning choices. | | | | | | | | | | | |  | | |  | | | |  | |  |
|  | My cultural beliefs influence my views on family planning. | | | | | | | | | | | |  | | |  | | | |  | |  |
|  | I have friends or family members who support my decision to use family planning methods. | | | | | | | | | | | |  | | |  | | | |  | |  |
|  | I feel comfortable discussing family planning issues with my social support network. | | | | | | | | | | | |  | | |  | | | |  | |  |
|  | Family planning is widely accepted in my community. | | | | | | | | | | | |  | | |  | | | |  | |  |
|  | There is pressure in my community for men to have many children. | | | | | | | | | | | |  | | |  | | | |  | |  |
|  | Family planning information is readily available in my community. | | | | | | | | | | | |  | | |  | | | |  | |  |
|  | I know where to seek reliable family planning information when needed. | | | | | | | | | | | |  | | |  | | | |  | |  |
|  | The media has influenced my attitudes towards family planning positively. | | | | | | | | | | | |  | | |  | | | |  | |  |
|  | Fear of side effects has prevented me from using family planning methods in the past. | | | | | | | | | | | |  | | |  | | | |  | |  |
|  | The number of sexual partners I have influences my family planning decisions. | | | | | | | | | | | |  | | |  | | | |  | |  |
|  | My peers' opinions about family planning influence my decisions. | | | | | | | | | | | |  | | |  | | | |  | |  |
|  | Peer pressure affects my family planning choices. | | | | | | | | | | | |  | | |  | | | |  | |  |
|  | There is stigma attached to accessing family planning services in my community. | | | | | | | | | | | |  | | |  | | | |  | |  |
|  | My community supports initiatives to improve access to family planning services. | | | | | | | | | | | |  | | |  | | | |  | |  |

**THANK YOU FOR YOUR PARTICIPATION**
